# Supplementary material
Source: PubMed Central journal article supplement (PMC10334573)
Supplement: NIHMS1896561-supplement-1.pdf [file NIHMS1896561-supplement-1.pdf]

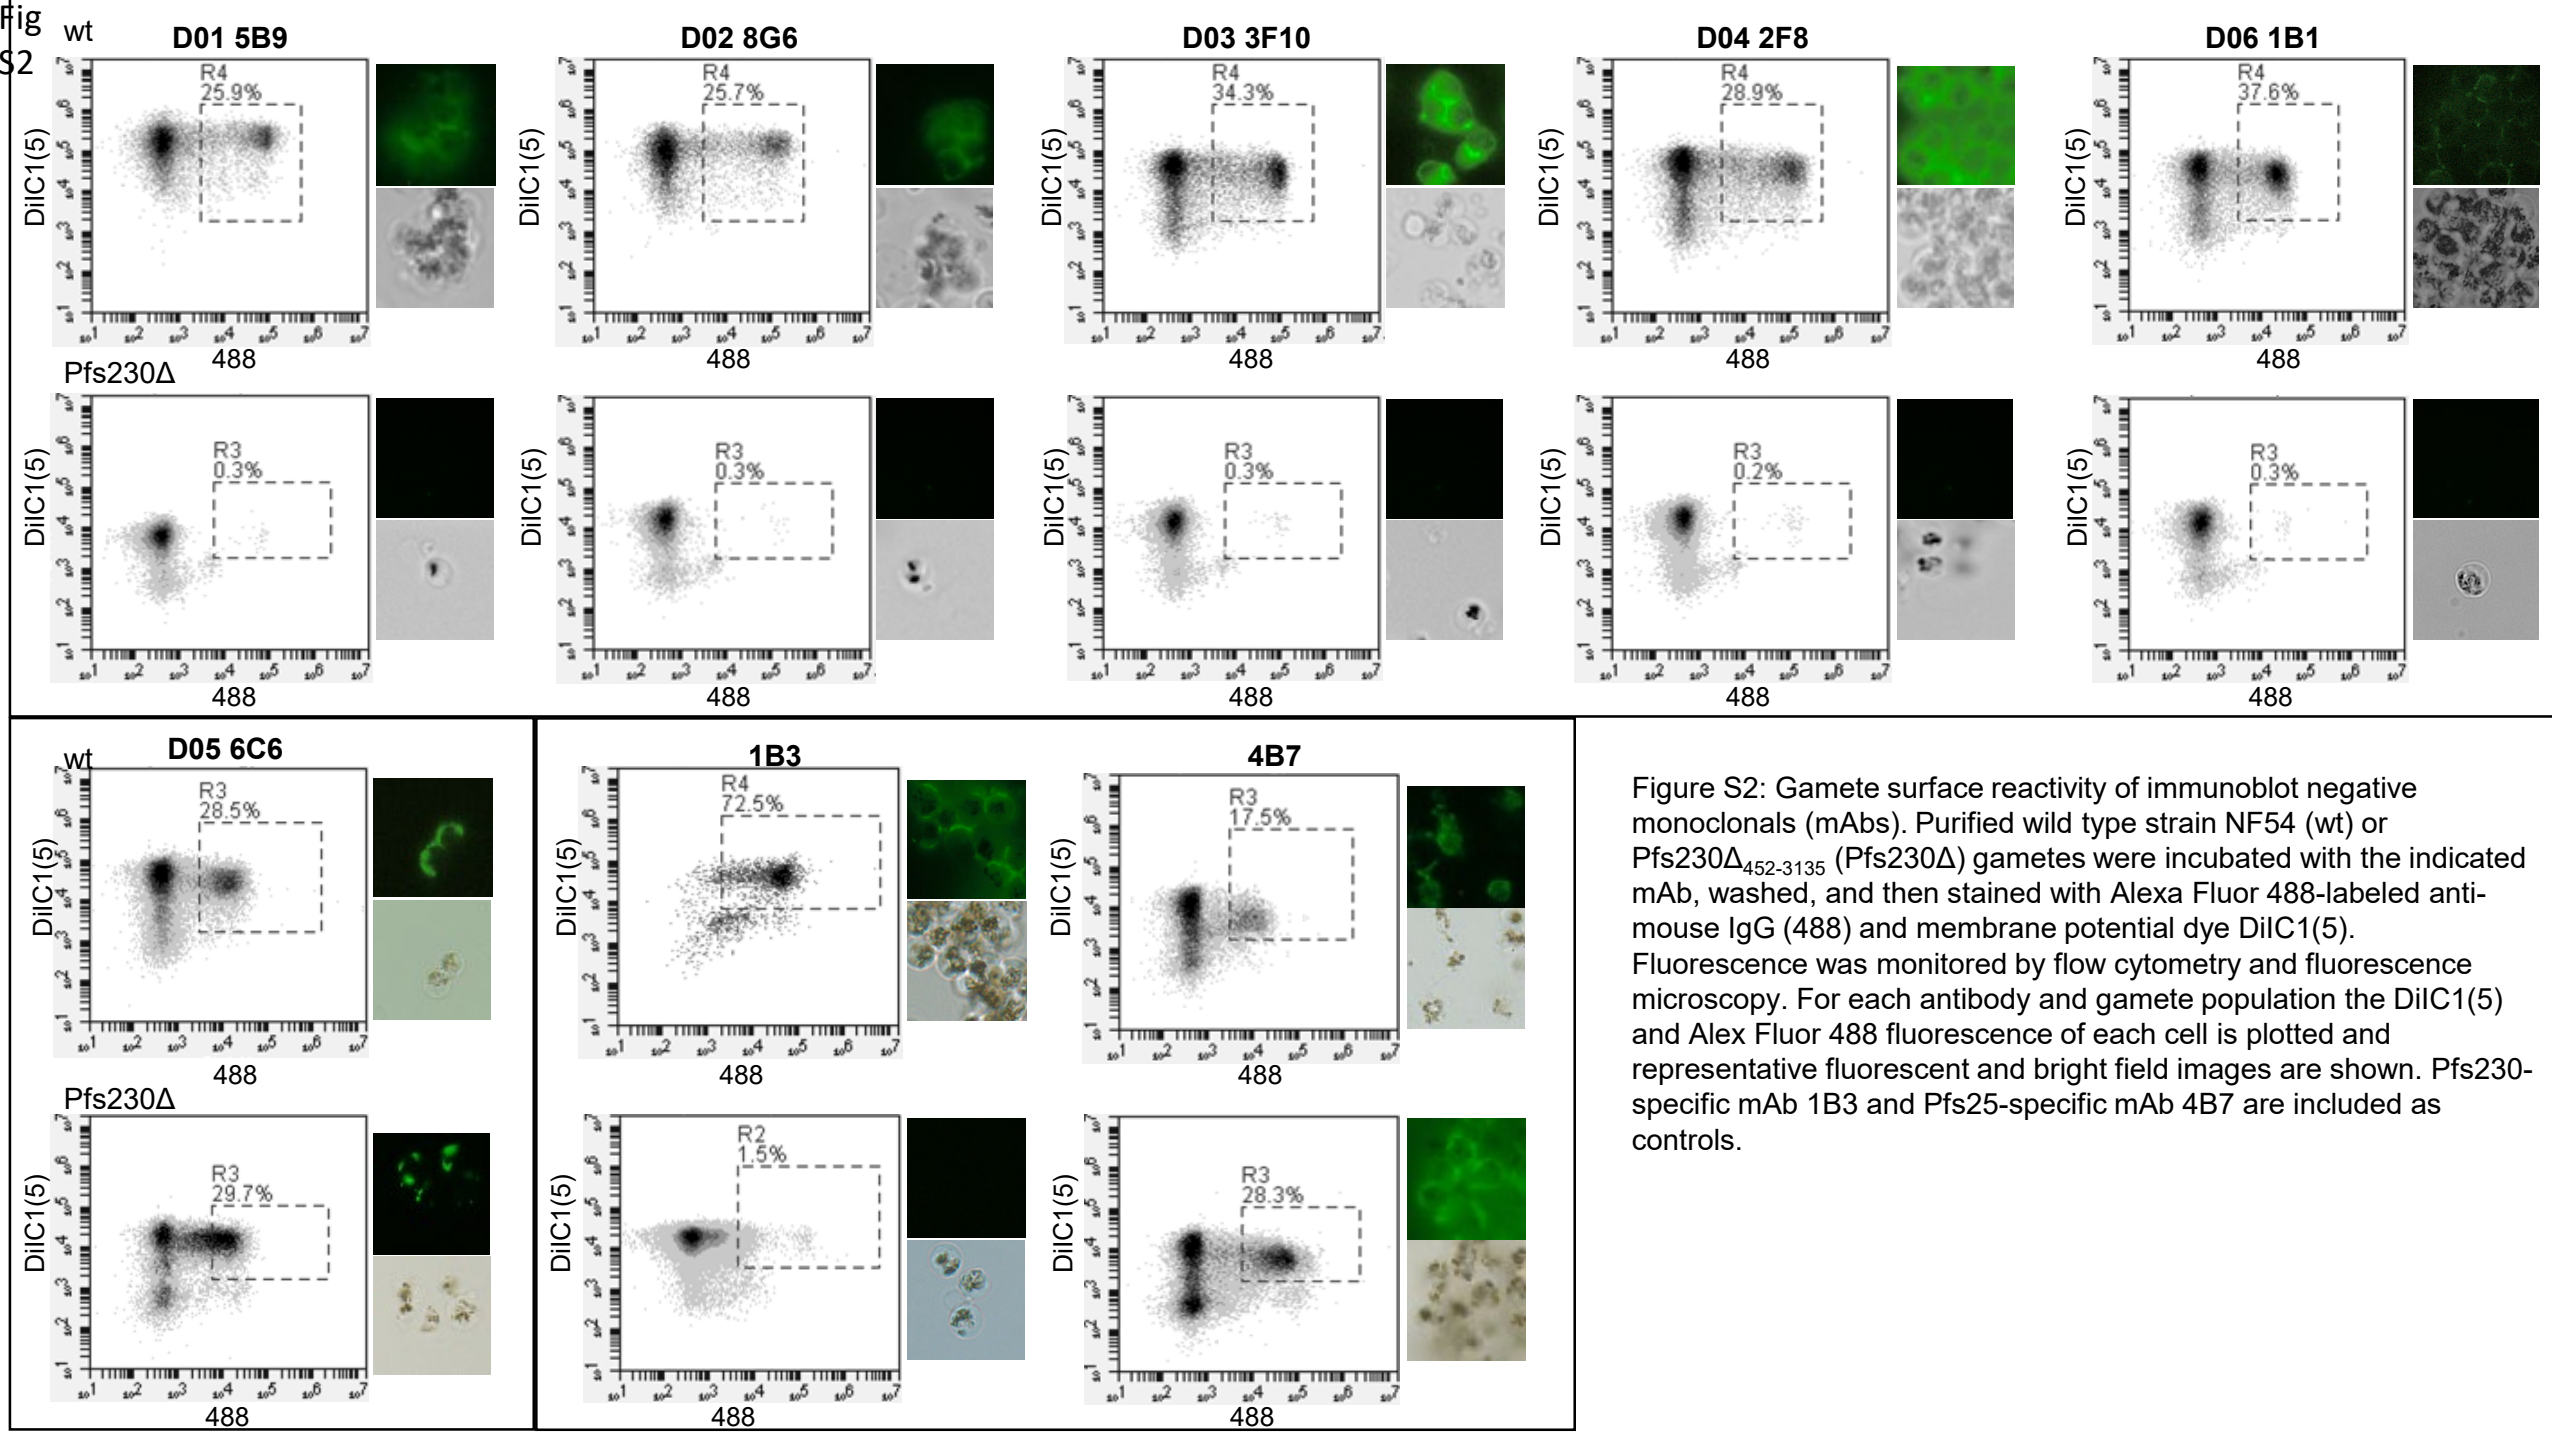

Fig S3

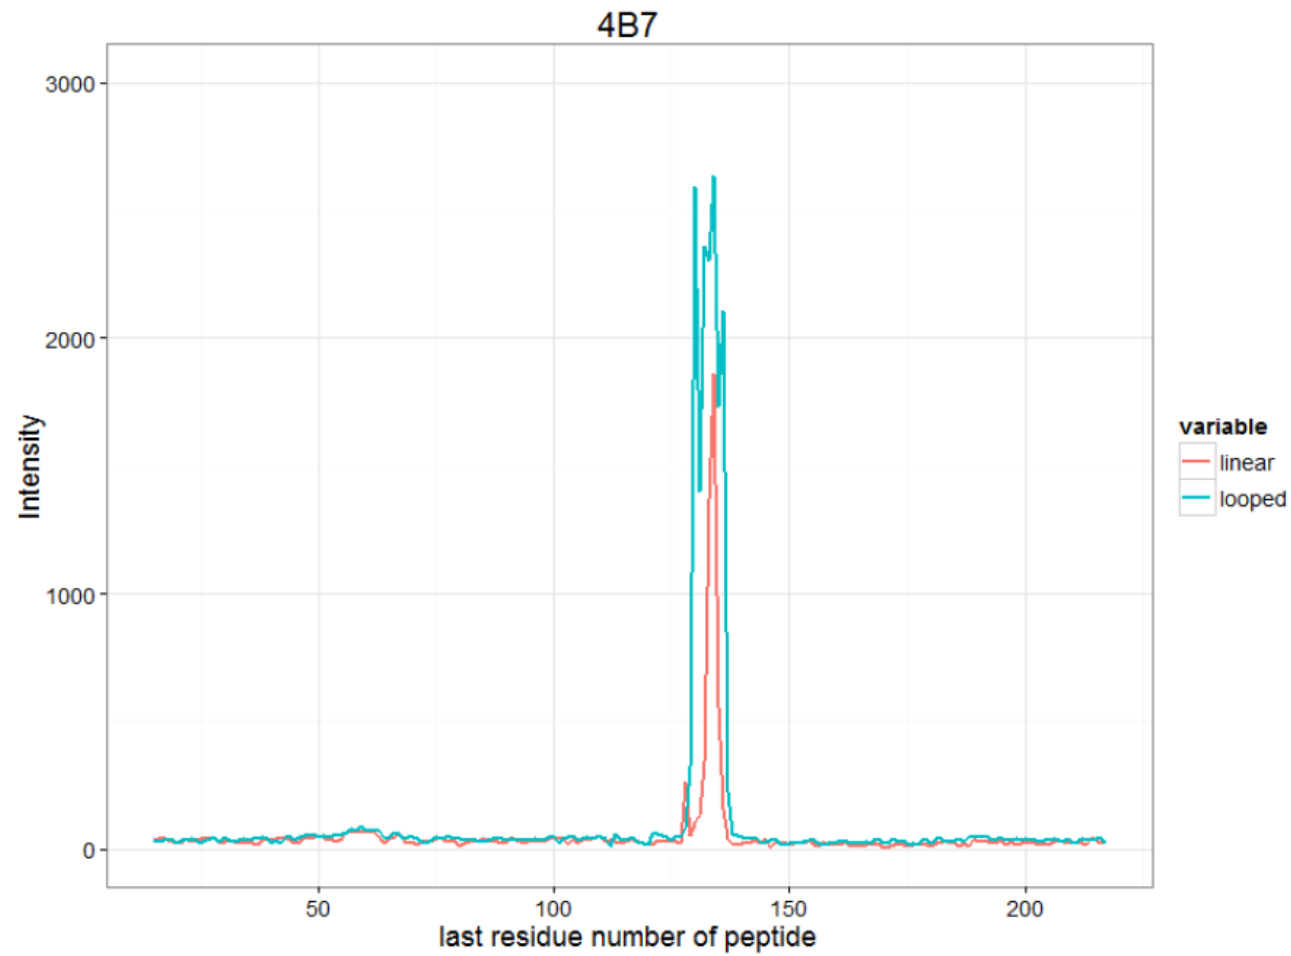

Figure S3: Peptides bound by monoclonal (mAb) 4B7. The fluorescence intensity of mAb 4B7 binding to two sets of peptides corresponding to Pfs25. One set was linear fifteen aa peptides with an offset of one residue (orange) and the other set was looped by adding cysteine residues at both ends of the one aa offset 15 aa Pfs25 peptides to allow disulfide binding (cyan).

Table S1: Standard membrane feeding assay using monoclonals purified from standard hybridoma media

| Immuno-<br>blot | Sample name  | IgG<br>conc<br>[ug/ml] | %<br>Un-<br>infect | Oocyst |      | % Inhibition |             |             |             |
|-----------------|--------------|------------------------|--------------------|--------|------|--------------|-------------|-------------|-------------|
|                 |              |                        |                    | Range  | Ave  | Estimate     | 95%CI<br>Lo | 95%CI<br>Hi | p-<br>value |
|                 | Human serum  | 0                      | 10                 | 0-39   | 13.1 |              |             |             |             |
| Pfs25           | 4B7          | 93.8                   | 90                 | 0-1    | 0.1  | 99.2         | 97.3        | 100         | 0.001       |
| Neg Ctr         | F5 15F7      | 375.0                  | 30                 | 0-87   | 16.7 |              |             |             |             |
| Pfs230          | F3 09F4 5E1  | 375.0                  | 50                 | 0-21   | 4.5  | 73.4         | 23.5        | 90.9        | 0.015       |
|                 | F5 6D11 7E5  | 375.0                  | 85                 | 0-6    | 0.4  | 97.6         | 91.9        | 99.5        | 0.001       |
|                 | F5 05A6 2F5  | 375.0                  | 75                 | 0-4    | 0.4  | 97.6         | 92.5        | 99.3        | 0.001       |
| Pfs48/45        | F2 14E5 1G9  | 375.0                  | 25                 | 0-16   | 3    | 79.5         | 42.7        | 93.3        | 0.002       |
| Pfs25           | F5 04F5 2C7  | 375.0                  | 20                 | 0-25   | 5.1  | 69.5         | 8.2         | 89.6        | 0.036       |
| Neg             | F3 14A1 2H11 | 375.0                  | 30                 | 0-18   | 5.0  | 70.1         | 11.7        | 89.8        | 0.031       |

Table S2: Mass Spectrometry results for the material immunoprecipitated from Triton X-100 gamete extracts using the indicated monoclonal (mAb)

| Accession     | Description                     | Sum PEP Score <sup>a</sup> | Coverage | # Pep-tides | # PSMs | # Unique Peptides | # Protein Groups | # AAs | MW [kDa] | calc. pI | Confidence | Area: F1: Sample | emPAI | Score Sequest HT | # Peptides Sequest HT |
|---------------|---------------------------------|----------------------------|----------|-------------|--------|-------------------|------------------|-------|----------|----------|------------|------------------|-------|------------------|-----------------------|
| mAb 2H11      |                                 |                            |          |             |        |                   |                  |       |          |          |            |                  |       |                  |                       |
| PF3D7_0209000 | 6-cysteine protein (P230)       | 35.13                      | 6.86     | 17          | 30     | 17                | 1                | 3135  | 363      | 5.45     | High       | 7.32E+06         | 0.279 | 77.72            | 17                    |
| PF3D7_1008700 | tubulin beta chain              | 19.25                      | 19.33    | 7           | 21     | 7                 | 1                | 445   | 49.7     | 4.83     | High       | 6.22E+06         | 1.462 | 58.99            | 7                     |
| PF3D7_1246200 | actin I (ACT1)                  | 16.92                      | 23.67    | 7           | 30     | 7                 | 1                | 376   | 41.8     | 5.34     | High       | 5.04E+06         | 1.754 | 68.97            | 7                     |
| PF3D7_1130200 | 60S ribosomal protein P0 (Pfp0) | 4.32                       | 6.96     | 2           | 11     | 2                 | 1                | 316   | 34.9     | 6.71     | High       | 6.49E+05         | 0.245 | 26.94            | 2                     |
| PF3D7_0903700 | alpha tubulin 1                 | 3.97                       | 6.84     | 2           | 3      | 2                 | 1                | 453   | 50.3     | 5.06     | High       | 1.04E+06         | 0.212 | 5.41             | 2                     |
| PF3D7_0917900 | heat shock protein 70 (HSP70-2) | 3.94                       | 3.53     | 2           | 2      | 2                 | 1                | 652   | 72.3     | 5.31     | High       | 2.74E+06         | 0.125 | 5.93             | 2                     |

mAb 11A6

|               |                                 |        |       |    |     |    |   |      |      |      |      |          |         |        |    |
|---------------|---------------------------------|--------|-------|----|-----|----|---|------|------|------|------|----------|---------|--------|----|
| PF3D7_0209000 | 6-cysteine protein (P230)       | 298.92 | 36.91 | 93 | 170 | 93 | 1 | 3135 | 363  | 5.45 | High | 3.73E+07 | 3.276   | 452.62 | 93 |
| PF3D7_1346800 | 6-cysteine protein (P47)        | 135.79 | 54.90 | 25 | 189 | 25 | 1 | 439  | 50.8 | 8.31 | High | 3.24E+08 | 108.648 | 427.90 | 25 |
| PF3D7_0917900 | heat shock protein 70 (HSP70-2) | 45.83  | 39.57 | 18 | 23  | 18 | 1 | 652  | 72.3 | 5.31 | High | 9.02E+06 | 2.07    | 58.69  | 18 |
| PF3D7_1008700 | tubulin beta chain              | 41.58  | 38.20 | 12 | 15  | 12 | 1 | 445  | 49.7 | 4.83 | High | 1.00E+07 | 3.489   | 45.36  | 12 |
| PF3D7_0818900 | heat shock protein 70 (HSP70)   | 30.09  | 19.65 | 12 | 18  | 12 | 1 | 677  | 73.9 | 5.67 | High | 3.08E+06 | 1.239   | 49.11  | 12 |

mAb 2D8

|               |                                 |        |       |    |     |    |   |     |      |      |      |          |         |        |    |
|---------------|---------------------------------|--------|-------|----|-----|----|---|-----|------|------|------|----------|---------|--------|----|
| PF3D7_0818900 | heat shock protein 70 (HSP70)   | 141.35 | 43.87 | 29 | 99  | 29 | 1 | 677 | 73.9 | 5.67 | High | 7.08E+07 | 12.335  | 277.96 | 29 |
| PF3D7_0917900 | heat shock protein 70 (HSP70-2) | 117.62 | 47.70 | 28 | 101 | 28 | 1 | 652 | 72.3 | 5.31 | High | 5.18E+07 | 9       | 280.92 | 28 |
| PF3D7_0708400 | heat shock protein 90 (HSP90)   | 114.90 | 31.95 | 25 | 103 | 25 | 1 | 745 | 86.1 | 5.01 | High | 1.17E+08 | 5.434   | 278.28 | 25 |
| PF3D7_1008700 | tubulin beta chain              | 106.67 | 38.88 | 16 | 142 | 16 | 1 | 445 | 49.7 | 4.83 | High | 2.03E+08 | 19.153  | 431.32 | 16 |
| PF3D7_0903700 | alpha tubulin 1                 | 93.02  | 40.84 | 15 | 84  | 4  | 1 | 453 | 50.3 | 5.06 | High | 3.09E+07 | 12.335  | 238.81 | 15 |
| PF3D7_0422300 | alpha tubulin 2                 | 91.96  | 43.56 | 15 | 101 | 4  | 1 | 450 | 49.7 | 5.01 | High | 1.62E+07 | 15.876  | 281.57 | 15 |
| PF3D7_1222300 | endoplasmic, putative (GRP94)   | 90.90  | 33.62 | 25 | 65  | 25 | 1 | 821 | 95   | 5.41 | High | 3.94E+07 | 2.682   | 173.23 | 25 |
| PF3D7_1302100 | gamete antigen 27/25 (G27/25)   | 90.29  | 57.60 | 16 | 180 | 16 | 1 | 217 | 26   | 6.89 | High | 9.25E+08 | 118.378 | 417.36 | 16 |
| PF3D7_1246200 | actin I (ACT1)                  | 86.20  | 42.29 | 18 | 90  | 16 | 1 | 376 | 41.8 | 5.34 | High | 8.69E+07 | 11.023  | 283.43 | 18 |

<sup>a</sup>Sum PEP Score: The protein score, which is the sum of the scores of the individual peptides using SEQUEST search algorithm, for which the score is the sum of all peptide Xcorr<sup>b</sup> values above the specified score threshold. The score threshold is calculated as follows:  $0.8 + \text{peptide\_charge} \times \text{peptide\_relevance\_factor}$  where peptide\_relevance\_factor is a parameter with a default value of 0.4.

For each spectrum and sequence, the Proteome Discoverer application uses only the highest scored peptide. When it performs a search using dynamic modifications, one spectrum might have multiple matches because of permutations of the modification site.

Coverage: The percent coverage calculated by dividing the number of amino acids in all found peptides by the total number of amino acids in the entire protein sequence.

# Peptides: The number of distinct peptide sequences in the protein group.

# PSMs: The total number of identified peptide sequences (peptide spectrum matches) for the protein, including those redundantly identified.

# Unique peptides: The number of peptide sequences unique to a protein group.

# Protein Groups: The number of identified proteins in the protein group of a master protein. Proteins are grouped based on sequence homology and/or isoforms as explained below.

# AAs, MW [kDa], calc. pI: The calculated parameters of the protein based on the amino acid sequence in the FASTA database used to generate the report. The Proteome Discoverer application calculates the molecular weight without considering post-translational modifications.

Confidence: Confidence that PSMs are from the identified protein

Area: The area of the peaks from the spectra for each peptide

emPAI: Exponentially modified protein abundance index (emPAI) for estimation of absolute protein amount in proteomics by the number of sequenced peptides per protein

Score Sequest HT: The sum of the scores of the individual peptides.

# Peptides Sequest HT: # of peptides found by Sequest HT, which is the search engine used in Proteome Discoverer

<sup>b</sup>Xcorr: A search-dependent score. It scores the number of fragment ions that are common to two different peptides with the same precursor mass and calculates the cross-correlation score for all candidate peptides queried from the database by SEQUEST searches. (Jimmy K. Eng, Ashley L. McCormack, and John R. Yates, III; An Approach to Correlate Tandem Mass Spectral Data of Peptides with Amino Acid Sequences in a Protein Database. J. Am. Soc. Mass Spectrom. 1994, 5, 976-989)
